# Supplementary material for: The Two Caenorhabditis elegans UDP-Glucose:Glycoprotein Glucosyltransferase Homologues Have Distinct Biological Functions
Source: PubMed Central journal article supplement (PMC3206904; doi:10.1371/journal.pone.0027025), 2011-11-02
Supplement: pone.0027025.s003.pdf [file pone.0027025.s003.pdf]

460 470 480 490 500  
 HUGT1 LN-IQPSE-ADYAVDIRSPAISWVNNLEVDSRYNSWSPSSLQELLRPTFPG 487  
 HUGT2 LN-SHIWE-YTYVLDIRHSSIMWINDLENDLLYITWPTSCKQLLKPVPFPG 473  
 CeUGGT1 MD-TSDDEKTTYAVDHRREGYPFFINNLDTDKKYKQWGN SVKIMLQPYYPG 449  
 CeUGGT2 LVDLSSVKLSEHAFDYSIAEPVYLNLDLES---TRSPYKSLMLMLQPFPPG 454  
 Clustal Consensus : : :..\* :\*:\*: : \* :\*: \* \*\* 176

510 520 530 540 550  
 HUGT1 VIRQIRKNNLHNMVFIVDPAHETTAELMNTAEMFLSNH IPLRIGFIFVVD 537  
 HUGT2 SVPSIRRNFNHLVLFIDPAQEYTLDFIKLADVFSHEVPLRIGFVILNT 523  
 CeUGGT1 MIRPIARNLFSLVFVDPSTSEGRKFLRIGQTFNSHDIAMRIGYIFAVNQ 499  
 CeUGGT2 QIRPISRNIFNLMFLDPFSDDDRVDVIRNFQTG-IHIRFGFVPILDE 503  
 Clustal Consensus : \* :\*:..:..:\*\*\* . : \* : : :\*:\*: : :

560 570 580 590 600  
 HUGT1 SEDVDGMQDAGVAVLRAINYVAQEVDDYHAFQTLTHIYNKVRTG-EKVKV 586  
 HUGT2 DDEVGDANDAGVALWRAFNYIAEEFDISEAFISIVHMYQVKKDKQNILTV 573  
 CeUGGT1 DTKASGETDLGVALNLFNFVVSIDSSNADALKVNNFLDDYRSK--DPTI 547  
 CeUGGT2 AKYG----- 507  
 Clustal Consensus

610 620 630 640 650  
 HUGT1 EHVVSVLEKKYPYVEVNSILGIDSAYDRNRKEARGYYEQTGVGPLPVVLF 636  
 HUGT2 DNVKSVLQNTFPHANIWDILGIHISKYDEERKAGASFYKMTGLGPLQALY 623  
 CeUGGT1 EDIKEFFFEAKFSDASFSDVFGVNSDYDKGRKHGFEFVQKTGLNSAPKVL 597  
 CeUGGT2 KSIIEAVDSMIVPPTKKVFWKSKDSLINALKKGSRFVAEAGLTQLPLVLL 557  
 Clustal Consensus . : . : . . . \* . : :\*: \* . \* 208

660 670 680 690 700  
 HUGT1 NGMPFEREQLDPELETITMHELETTTFFQRAVYLGELPHDQDVVEYIM 686  
 HUGT2 NGEFPKHEEMNIKELKMAVLQRMMDASVYLQREVFGLTNDRTNAIDFLM 673  
 CeUGGT1 NGFILDDEGVRGDNIEETIMMEVMKISPKIQRIMECKLIDRMNVGNWVL 647  
 CeUGGT2 NGYPLDVTSIER--FESSLTQNIQKQTRQLQALHGLIEDSVQIDRWVF 605  
 Clustal Consensus \*\* :. : : : . : : \* : \* : . : : : 224

710 720 730 740 750  
 HUGT1 NQPNVVRINRILTA--ERDYLDLTASN--FFVDDYARFTILD SQGKTA 733  
 HUGT2 DRNNVVRINTLILRT--NQYLNLI STSVTADVEDFSTFFFLDSQDKSA 721  
 CeUGGT1 EOKDVMPRINKRILSAPSKKTYVEILGSMDCSKLKDVEN---LSDSKAG 694  
 CeUGGT2 EK-----KTNPDIIQRLNQRITTAFFNNKEFLNISRRSI 638  
 Clustal Consensus :: : : : : \* . . : : 232

760 770 780 790 800  
 HUGT1 AVANSNMNYLTKKGMSSKEIYDDSFIRPVTEFWIVGDFDSPSGRQLLYDAIK 783  
 HUGT2 VIAKNMYYLTDQ-----DESII SAVTLWIIADFDKPSGRKLLFNALK 763  
 CeUGGT1 CLLQTTKYLQKA-----SADSILPVTLWVVADAEAAASGRRFIYNSLQ 736  
 CeUGGT2 QFLKNVHYFSEES-----DTVLANADVTTWIIADFFENPSNRLFATKAIR 682  
 Clustal Consensus . : . \* : : \*\* \*::\* : . \* . \* : : : :

810 820 830 840 850  
 HUGT1 HQKSSNNVRISMNNP-AKEISYENTQISRAIWAALQTQTSNAAKNFITK 832  
 HUGT2 HMKTSVHSRLGIIYNP-TSKINEENTAIRGILAAFLTQKNMFLRSFLGQ 812  
 CeUGGT1 ILKNSANSRVGIIENPESEKACESNSISSYIRAALDFLPMDAQRLILK 786  
 CeUGGT2 SIASQKNKIALIPNPSSSRSDNPNCSFN-----FENVGPNSDMTILSK 726  
 Clustal Consensus . . : :\*: \*\* : . : : : : : : : : :

860 870 880 890 900  
 HUGT1 MAKEGAAEALAAGAD-IAEFSVGGMDFSLFKEVFESSKMDFILSHAVYCR 881  
 HUGT2 LAKEEIIATAIYSGDK-IKTFLIEGMDKNAFEKKYNTVGVNIFRTHQLFCQ 861  
 CeUGGT1 LSNEEYAADFISGKITFDDLSVGGMDTAKFLADKKKLDCESTRLESQIVK 836  
 CeUGGT2 IES-----FCMKNINLSPLDIG----- 743  
 Clustal Consensus : . : : : : : : : : : 269



CeUGGT2  
Clustal Consensus

1360 1370 1380 1390 1400

HUGT1  
HUGT2  
CeUGGT1  
CeUGGT2  
Clustal Consensus

1410 1420 1430 1440 1450

HUGT1  
HUGT2  
CeUGGT1  
CeUGGT2  
Clustal Consensus

1460 1470 1480 1490 1500

HUGT1  
HUGT2  
CeUGGT1  
CeUGGT2  
Clustal Consensus

1510 1520 1530 1540 1550

HUGT1  
HUGT2  
CeUGGT1  
CeUGGT2  
Clustal Consensus

1560 1570

HUGT1  
HUGT2  
CeUGGT1  
CeUGGT2  
Clustal Consensus

```

LNNTKTQKVKFWL LKNYLSPKFKET IIPKLA E FYKFE FELVEYKWPKWLHK 1167
:.***      *****:*****  ***  :*  :*  *  *.:***:***:***:***:  467

      1360      1370      1380      1390      1400
.....|.....|.....|.....|.....|.....|.....|.....|.....|.....|.....|
HUGT1  QTEKQRIIWGYKILFLDVLFPLVVDKELFVDADQIVRIDLKELRDFNLDG 1377
HUGT2  QTERQRIIWGYKILFLDVLFPLAVDKIIFVDADQIVRHDLKELRDFDLDG 1352
CeUGGT1 QKEKQRIWGFKILFLDVLFPLDVQKVI FVDADQVVRADLMELMKFDLGN 1323
CeUGGT2 QTEKQRMWGYKILFLDVLFPLVVDKII FVDADQVVRADLQELMDFNLNG 1217
Clustal Consensus *.:***:***:***** ***** *:*.:*****:*** ** ** .*:*.  508

      1410      1420      1430      1440      1450
.....|.....|.....|.....|.....|.....|.....|.....|.....|.....|.....|
HUGT1  APYGYTPFCDSRREMDGYRFWKS GYWASHLAGRKYHISALYVVDLKKFRK 1427
HUGT2  APYGYTPFCDSRREMDGYRFWKTGYWASHLLRRKYHISALYVVDLKKFRR 1402
CeUGGT1 APYGYVPFCESRKEMDGF RFWKQGYWANHLAGRRYHISALYVIDLQKFRQ 1373
CeUGGT2 APYGYVPFCESRTEM DGF RFWKS GYWKNHLMGRKYHISALYVVDLKA FRE 1267
Clustal Consensus *****.:***:*** *****:***** *** .* *.:*****:***: **  549

      1460      1470      1480      1490      1500
.....|.....|.....|.....|.....|.....|.....|.....|.....|.....|.....|
HUGT1  IAAGDRLRGQYQGLSODPNSLSNLDQDLPNNMIHQVPIKSLPQEWLWCET 1477
HUGT2  IGAGDRLRSQYQALSODPNSLSNLDQDLPNNMIYQVAIKSLPQDWLWCET 1452
CeUGGT1 IAAGDRLRGQYQGLSGDPNSIANLDQDLPNNMIHQVKIKSLPQEWLWCET 1423
CeUGGT2 FSAGDRLRGRYDLSADPNSLSNLDQDLPNNMLHEVPIKSLPQEWLWCET 1317
Clustal Consensus :.*****.:*:* ** *****:*****:***:*** *****:*****  594

      1510      1520      1530      1540      1550
.....|.....|.....|.....|.....|.....|.....|.....|.....|.....|.....|
HUGT1  WCDDASKKRAKTIDL CNNPMTKEPKLEAAVRIVPEWQDYDQEIKQLQIRF 1527
HUGT2  WCDDDESKQRAKTIDL CNNPKTKE SKLKAAARIVPEWVEYDAEIRQLLDHL 1502
CeUGGT1 WCDDGSKKNAKTIDL CNNP LTKEPKLD SAARIIGEWKTYDDEIREVISGH 1473
CeUGGT2 WCDDGSKEKAKTIDL CNNP LTKEPKLN SAKRII KEWTEYDSEISKVLNSA 1367
Clustal Consensus **** *.:***** *****:***:***:*** ** ** ** ** **  629

      1560      1570
.....|.....|.....|.....|.....|.....|.....|.....|.....|.....|.....|
HUGT1  QKEKETGALYKEKTKEPSREGPQKREEL 1555
HUGT2  ENKKQDTIILTHDEL----- 1516
CeUGGT1 SSDNPSDNVISENDDSHTEL----- 1493
CeUGGT2 DINTPSPSVDRDEL----- 1381
Clustal Consensus . . . : : : 632

```
